# Supplementary material
Source: PubMed Central journal article supplement (PMC8049176)
Supplement: NIHMS1660401-supplement-5.pdf [file NIHMS1660401-supplement-5.pdf]

**Supplemental Table 1:** This table lists values of angular velocity ( $\omega$ ) squared, angular acceleration ( $\alpha$ ), brain volume, maximum principal strain (MPS), and fiber strain ( $E_f$ ) in the corpus callosum (CC) and brainstem (BS) for each subject. Brain volume was computed by summing the volume of each brain tissue element in the finite element mesh used in the harmonic phase finite element (HARP-FE) method.

| Subject | $\omega^2$ (rad <sup>2</sup> /s <sup>2</sup> ) | $\alpha$ (rad/s <sup>2</sup> ) | Brain Volume (cm <sup>3</sup> ) | MPS Brain | $E_f$ CC | $E_f$ BS |
|---------|------------------------------------------------|--------------------------------|---------------------------------|-----------|----------|----------|
| NR1     | 11.56                                          | 247.1                          | 1382.3                          | 0.035     | 0.018    | 0.010    |
| NR2     | 12.46                                          | 235.2                          | 1489.2                          | 0.039     | 0.015    | 0.015    |
| NR3     | 11.70                                          | 218.5                          | 1429.6                          | 0.038     | 0.019    | 0.011    |
| NR4     | 9.73                                           | 209.6                          | 1292.8                          | 0.038     | 0.018    | 0.015    |
| NR5     | 6.50                                           | 179.2                          | 1193.3                          | 0.035     | 0.019    | 0.019    |
| NR6     | 13.76                                          | 237.5                          | 1468.2                          | 0.042     | 0.020    | 0.015    |
| NR7     | 13.91                                          | 240.5                          | 1403.7                          | 0.053     | 0.024    | 0.017    |
| NR8     | 13.32                                          | 230.6                          | 1342.6                          | 0.043     | 0.023    | 0.010    |
| NR9     | 6.35                                           | 156.4                          | 1118.8                          | 0.026     | 0.010    | 0.007    |
| NR10    | 5.86                                           | 173.4                          | 1137.5                          | 0.028     | 0.016    | 0.009    |
| NE1     | 4.08                                           | 347.5                          | 1463                            | 0.029     | 0.014    | 0.029    |
| NE2     | 3.24                                           | 322.0                          | 1213.8                          | 0.025     | 0.011    | 0.018    |
| NE3     | 3.35                                           | 318.3                          | 1298.9                          | 0.023     | 0.011    | 0.013    |

|      |      |       |        |       |       |       |
|------|------|-------|--------|-------|-------|-------|
| NE4  | 3.42 | 293.4 | 1416.4 | 0.029 | 0.014 | 0.028 |
| NE5  | 3.46 | 325.1 | 1320.6 | 0.021 | 0.010 | 0.015 |
| NE6  | 3.13 | 283.9 | 1582.2 | 0.022 | 0.012 | 0.018 |
| NE7  | 2.34 | 213.4 | 1482.2 | 0.021 | 0.012 | 0.008 |
| NE8  | 2.37 | 220.9 | 1572.5 | 0.024 | 0.012 | 0.012 |
| NE9  | 2.40 | 231.7 | 1411.8 | 0.019 | 0.009 | 0.008 |
| NE10 | 2.92 | 272.0 | 1478.7 | 0.024 | 0.012 | 0.021 |
